# Supplementary material for: Early Transcriptional Responses of Human Nasal Epithelial Cells to Infection with Influenza A and SARS-CoV-2 Virus Differ and Are Influenced by Physiological Temperature
Source: MDPI journal article supplement (doi:10.3390/pathogens12030480), 2023-03-18
Supplement: s1 [file s1]

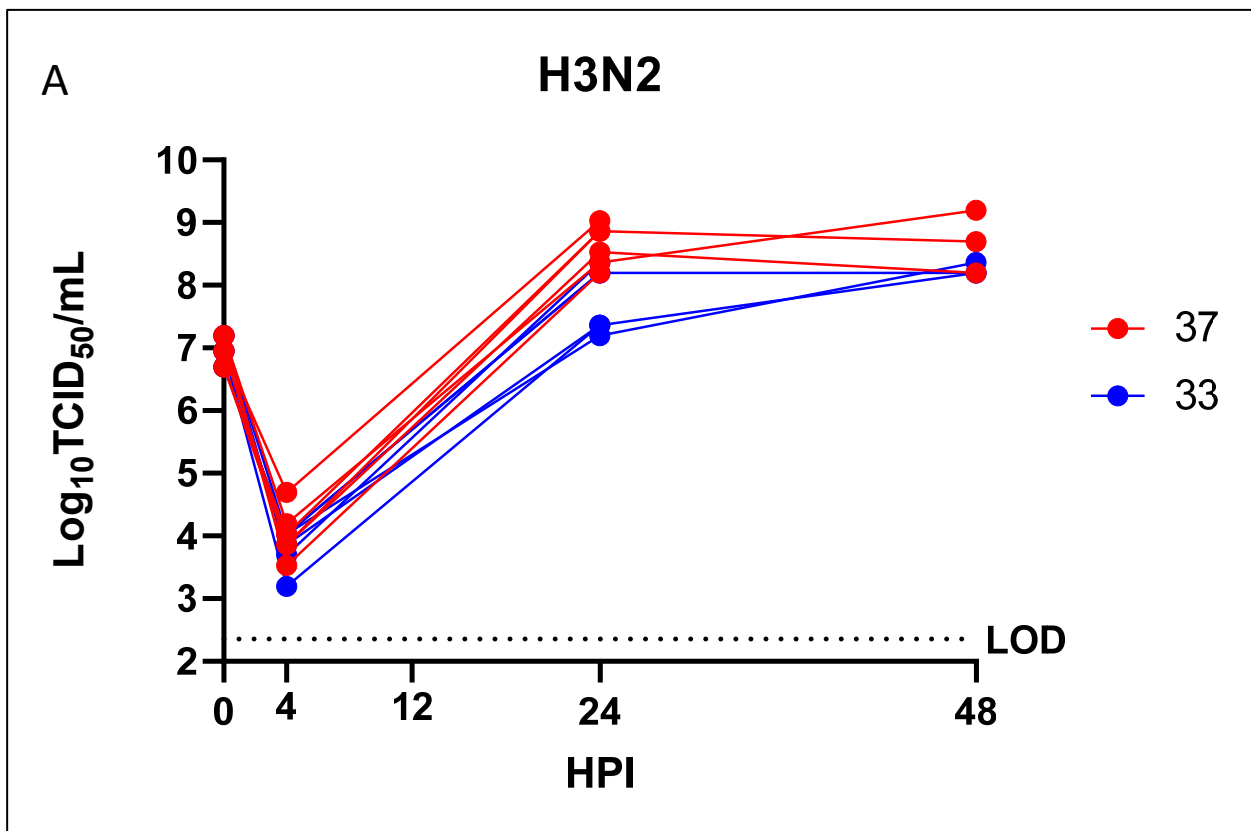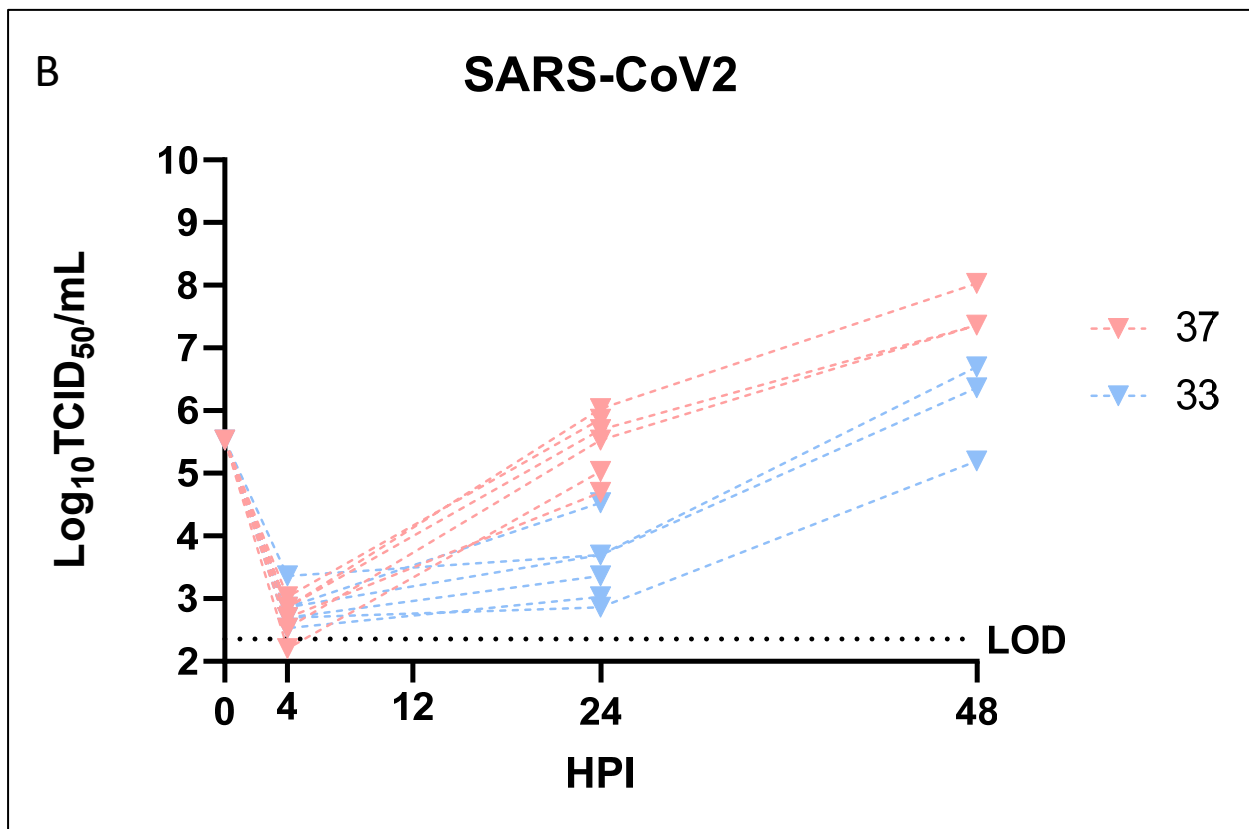

**Figure S2:** Infectious virus present in apical washes of RNA-seq samples infected with SARS-CoV-2 (B) and IAV (A) viruses at 33°C or 37°C. hNEC cultures were infected at low MOI, and followed for a multistep growth curves at 33°C and 37°C with the indicated viruses. Apical washes were taken at the timepoint indicated before sample collection. Each sample is graphed individually, and 48hr samples were also checked at 24HPI.
