# Supplementary material for: Early Transcriptional Responses of Human Nasal Epithelial Cells to Infection with Influenza A and SARS-CoV-2 Virus Differ and Are Influenced by Physiological Temperature
Source: MDPI journal article supplement (doi:10.3390/pathogens12030480), 2023-03-18
Supplement: s1 [file s1]

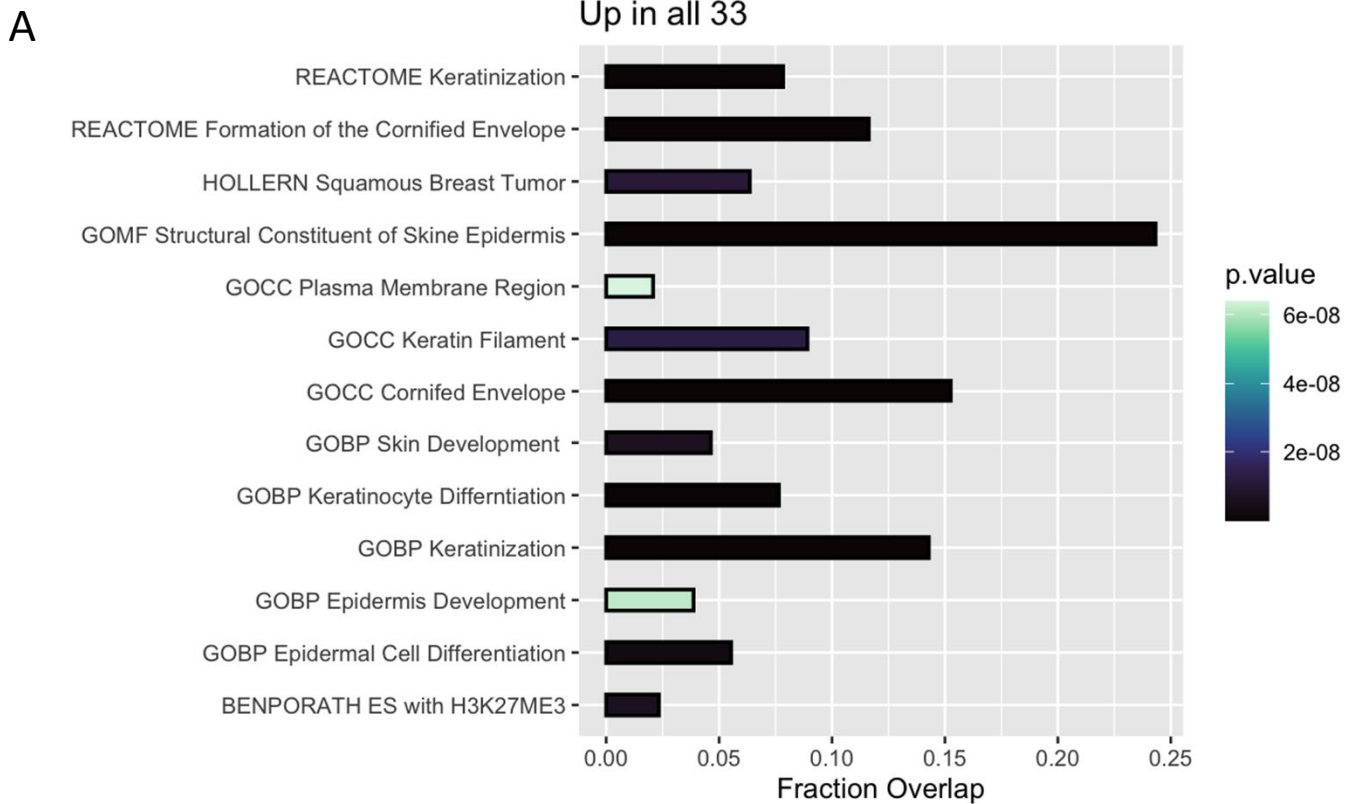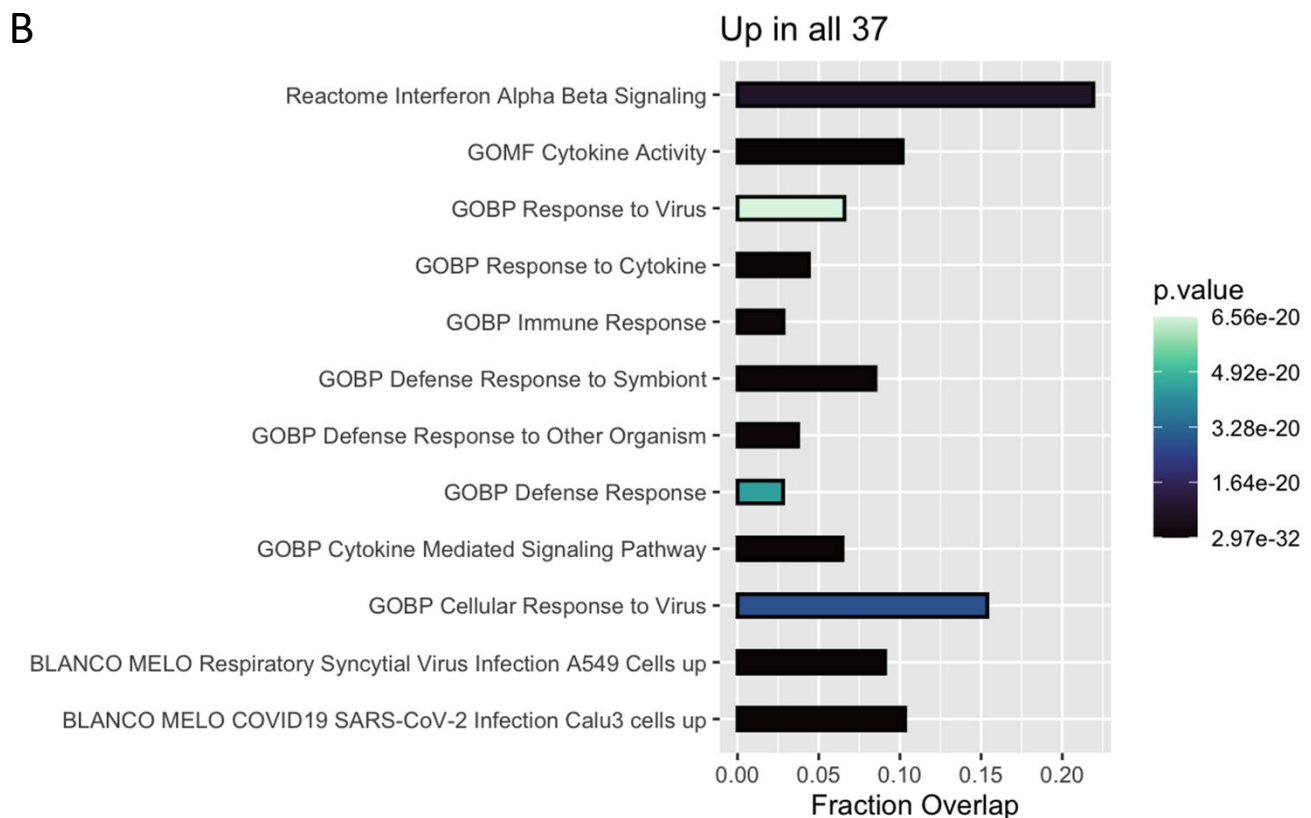

**Figure S3.** *Pathway analysis of differentially expressed genes between all 33°C and 37°C samples.* Differential expression analysis was run between all 33 and 37°C samples, regardless of virus treatment, and the top 250 genes were used for pathway enrichment analysis.
