# Supplementary material for: Early Transcriptional Responses of Human Nasal Epithelial Cells to Infection with Influenza A and SARS-CoV-2 Virus Differ and Are Influenced by Physiological Temperature
Source: Pathogens. 2023 Mar 18;12(3):480. doi: 10.3390/pathogens12030480 (PMC10051809; doi:10.3390/pathogens12030480)
Supplement: Supplementary file 1 [file pathogens-12-00480-s001.zip]

Archive with 10 entries (10 files):
- supp Figure S1.html
- supp Figure S2.pdf
- supp Figure S3.pdf
- supp Figure S4.pdf
- supp Figure S5.pdf
- supp Figure S6.pdf
- supp Table S1.csv
- supp Table S2.csv
- supp Table S3.csv
- supp Table S4.csv
