# Supplementary material for: Early Transcriptional Responses of Human Nasal Epithelial Cells to Infection with Influenza A and SARS-CoV-2 Virus Differ and Are Influenced by Physiological Temperature
Source: Pathogens. 2023 Mar 18;12(3):480. doi: 10.3390/pathogens12030480 (PMC10051809; doi:10.3390/pathogens12030480)
Supplement: Supplementary file 1 [file pathogens-12-00480-s001.zip › supp Table S3.csv]

	baseMean	log2FoldChange	lfcSE	stat	pvalue	padj	hgnc_symbol	external_gene_name	description
9629	162.500285564677	-2.26409015922024	0.651639845949957	-3.47445014802565	0.000511901473822211	0.00664187703212248		CLCA3P	chloride channel accessory 3, pseudogene [Source:NCBI gene (formerly Entrezgene);Acc:9629]
6035	111.653540898125	-2.22773956387933	0.633291038527941	-3.51771843962552	0.000435273937437178	0.00584730551309005	RNASE1	RNASE1	ribonuclease A family member 1, pancreatic [Source:HGNC Symbol;Acc:HGNC:10044]
123264	100.104677640015	-1.66425161347539	0.432059674792358	-3.85190220372963	0.000117203832518876	0.00216544502576162	SLC51B	SLC51B	solute carrier family 51 subunit beta [Source:HGNC Symbol;Acc:HGNC:29956]
